# Supplementary material
Source: MDPI journal article supplement (https://www.mdpi.com/2304-6740/11/1/2)

## checkCIF/PLATON report

Structure factors have been supplied for datablock(s) JW1132\_01, JW1132\_02, JW1132\_03, JW1144a\_01\_sq\_sq, JW1144b\_01, as-hiwi-007a\_03, jw1110\_01, jw1110\_02, pd\_si01\_01, pd\_si03\_01, pd\_si03l\_01, sb-si01\_01a

THIS REPORT IS FOR GUIDANCE ONLY. IF USED AS PART OF A REVIEW PROCEDURE FOR PUBLICATION, IT SHOULD NOT REPLACE THE EXPERTISE OF AN EXPERIENCED CRYSTALLOGRAPHIC REFEREE.

No syntax errors found.      CIF dictionary      Interpreting this report

### Datablock: pd\_si01\_01

---

Bond precision:    C-C = 0.0028 A                      Wavelength=0.71073

Cell:                      a=10.6121 (6)              b=17.1874 (9)              c=11.2970 (6)  
                                alpha=90                      beta=92.385 (4)              gamma=90

Temperature:              180 K

|                        | Calculated       | Reported         |
|------------------------|------------------|------------------|
| Volume                 | 2058.73 (19)     | 2058.72 (19)     |
| Space group            | P 21/c           | P 21/c           |
| Hall group             | -P 2ybc          | -P 2ybc          |
| Moiety formula         | C22 H19 N3 O3 Si | C22 H19 N3 O3 Si |
| Sum formula            | C22 H19 N3 O3 Si | C22 H19 N3 O3 Si |
| Mr                     | 401.49           | 401.49           |
| Dx, g cm <sup>-3</sup> | 1.295            | 1.295            |
| Z                      | 4                | 4                |
| Mu (mm <sup>-1</sup> ) | 0.142            | 0.142            |
| F000                   | 840.0            | 840.0            |
| F000'                  | 840.66           |                  |
| h, k, lmax             | 14, 22, 14       | 14, 22, 14       |
| Nref                   | 4965             | 4961             |
| Tmin, Tmax             | 0.958, 0.979     | 0.958, 0.987     |
| Tmin'                  | 0.952            |                  |

Correction method= # Reported T Limits: Tmin=0.958 Tmax=0.987  
AbsCorr = INTEGRATION

Data completeness= 0.999                      Theta(max)= 27.999



R(reflections)= 0.0423( 3853)

wR2(reflections)=  
0.1176( 4961)

S = 1.118

Npar= 263

---

The following ALERTS were generated. Each ALERT has the format

**test-name\_ALERT\_alert-type\_alert-level.**

Click on the hyperlinks for more details of the test.

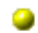

#### Alert level C

|                   |                                                |     |       |   |           |
|-------------------|------------------------------------------------|-----|-------|---|-----------|
| PLAT230_ALERT_2_C | Hirshfeld Test Diff for                        | Si1 | --C16 | . | 5.1 s.u.  |
| PLAT601_ALERT_2_C | Unit Cell Contains Solvent Accessible VOIDS of | .   |       |   | 50 Ang**3 |

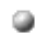

#### Alert level G

|                   |                                                  |              |
|-------------------|--------------------------------------------------|--------------|
| PLAT066_ALERT_1_G | Predicted and Reported Tmin&Tmax Range Identical | ? Check      |
| PLAT883_ALERT_1_G | No Info/Value for _atom_sites_solution_primary   | Please Do !  |
| PLAT910_ALERT_3_G | Missing # of FCF Reflection(s) Below Theta(Min). | 4 Note       |
| PLAT961_ALERT_5_G | Dataset Contains no Negative Intensities .....   | Please Check |
| PLAT967_ALERT_5_G | Note: Two-Theta Cutoff Value in Embedded .res .. | 56.0 Degree  |
| PLAT978_ALERT_2_G | Number C-C Bonds with Positive Residual Density. | 5 Info       |

---

0 **ALERT level A** = Most likely a serious problem - resolve or explain  
0 **ALERT level B** = A potentially serious problem, consider carefully  
2 **ALERT level C** = Check. Ensure it is not caused by an omission or oversight  
6 **ALERT level G** = General information/check it is not something unexpected

2 ALERT type 1 CIF construction/syntax error, inconsistent or missing data  
3 ALERT type 2 Indicator that the structure model may be wrong or deficient  
1 ALERT type 3 Indicator that the structure quality may be low  
0 ALERT type 4 Improvement, methodology, query or suggestion  
2 ALERT type 5 Informative message, check

---

## Datablock: sb-si01\_01a

---

Bond precision: C-C = 0.0039 A

Wavelength=0.71073

|              |                 |                |                 |
|--------------|-----------------|----------------|-----------------|
| Cell:        | a=9.7675(8)     | b=10.6315(8)   | c=17.7868(16)   |
|              | alpha=78.951(6) | beta=88.972(7) | gamma=77.779(6) |
| Temperature: | 180 K           |                |                 |



|                   |                                                  |     |        |
|-------------------|--------------------------------------------------|-----|--------|
| PLAT002_ALERT_2_G | Number of Distance or Angle Restraints on AtSite | 12  | Note   |
| PLAT003_ALERT_2_G | Number of Uiso or Uij Restrained non-H Atoms ... | 3   | Report |
| PLAT066_ALERT_1_G | Predicted and Reported Tmin&Tmax Range Identical | ?   | Check  |
| PLAT168_ALERT_4_G | The CIF-Embedded .res File Contains EXYZ Records | 2   | Report |
| PLAT171_ALERT_4_G | The CIF-Embedded .res File Contains EADP Records | 4   | Report |
| PLAT176_ALERT_4_G | The CIF-Embedded .res File Contains SADI Records | 5   | Report |
| PLAT177_ALERT_4_G | The CIF-Embedded .res File Contains DELU Records | 1   | Report |
| PLAT178_ALERT_4_G | The CIF-Embedded .res File Contains SIMU Records | 1   | Report |
| PLAT301_ALERT_3_G | Main Residue Disorder .....(Resd 1 )             | 12% | Note   |
| PLAT302_ALERT_4_G | Anion/Solvent/Minor-Residue Disorder (Resd 2 )   | 12% | Note   |
| PLAT860_ALERT_3_G | Number of Least-Squares Restraints .....         | 20  | Note   |



|                   |                                                  |      |              |
|-------------------|--------------------------------------------------|------|--------------|
| PLAT909_ALERT_3_G | Percentage of I>2sig(I) Data at Theta(Max) Still | 45%  | Note         |
| PLAT941_ALERT_3_G | Average HKL Measurement Multiplicity .....       | 2.7  | Low          |
| PLAT961_ALERT_5_G | Dataset Contains no Negative Intensities .....   |      | Please Check |
| PLAT965_ALERT_2_G | The SHELXL WEIGHT Optimisation has not Converged |      | Please Check |
| PLAT967_ALERT_5_G | Note: Two-Theta Cutoff Value in Embedded .res .. | 50.0 | Degree       |
| PLAT978_ALERT_2_G | Number C-C Bonds with Positive Residual Density. | 1    | Info         |

---

0 **ALERT level A** = Most likely a serious problem - resolve or explain  
 0 **ALERT level B** = A potentially serious problem, consider carefully  
 3 **ALERT level C** = Check. Ensure it is not caused by an omission or oversight  
 17 **ALERT level G** = General information/check it is not something unexpected

1 ALERT type 1 CIF construction/syntax error, inconsistent or missing data  
 4 ALERT type 2 Indicator that the structure model may be wrong or deficient  
 7 ALERT type 3 Indicator that the structure quality may be low  
 6 ALERT type 4 Improvement, methodology, query or suggestion  
 2 ALERT type 5 Informative message, check

---

## Datablock: jw1110\_01

---

|                        |                            |                            |
|------------------------|----------------------------|----------------------------|
| Bond precision:        | C-C = 0.0034 A             | Wavelength=0.71073         |
| Cell:                  | a=9.1764(4)                | b=18.4453(10)              |
|                        | alpha=90                   | beta=91.991(3)             |
| Temperature:           | 200 K                      | c=13.3241(5)               |
|                        |                            | gamma=90                   |
|                        | Calculated                 | Reported                   |
| Volume                 | 2253.90(18)                | 2253.89(18)                |
| Space group            | P 21/n                     | P 21/n                     |
| Hall group             | -P 2yn                     | -P 2yn                     |
| Moiety formula         | 2(C21 H17 Cl Cu N3 O3 Si), | 2(C21 H17 Cl Cu N3 O3 Si), |
|                        | C4 H8 O                    | C4 H8 O                    |
| Sum formula            | C46 H42 Cl2 Cu2 N6 O7 Si2  | C46 H42 Cl2 Cu2 N6 O7 Si2  |
| Mr                     | 1045.04                    | 1045.04                    |
| Dx, g cm <sup>-3</sup> | 1.540                      | 1.540                      |
| Z                      | 2                          | 2                          |
| Mu (mm <sup>-1</sup> ) | 1.175                      | 1.175                      |
| F000                   | 1072.0                     | 1072.0                     |
| F000'                  | 1074.53                    |                            |
| h,k,lmax               | 12,24,17                   | 12,24,17                   |
| Nref                   | 5440                       | 5437                       |
| Tmin,Tmax              | 0.809,0.868                | 0.754,0.898                |
| Tmin'                  | 0.703                      |                            |

Correction method= # Reported T Limits: Tmin=0.754 Tmax=0.898  
 AbsCorr = INTEGRATION



Data completeness= 0.999

Theta(max)= 28.000

R(reflections)= 0.0341( 4343)

wR2(reflections)=  
0.0848( 5437)

S = 1.068

Npar= 316

The following ALERTS were generated. Each ALERT has the format

**test-name\_ALERT\_alert-type\_alert-level.**

Click on the hyperlinks for more details of the test.

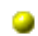

### Alert level C

PLAT906\_ALERT\_3\_C Large K Value in the Analysis of Variance ..... 2.682 Check

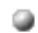

### Alert level G

PLAT002\_ALERT\_2\_G Number of Distance or Angle Restraints on AtSite 5 Note  
PLAT176\_ALERT\_4\_G The CIF-Embedded .res File Contains SADI Records 2 Report  
PLAT300\_ALERT\_4\_G Atom Site Occupancy of O4 Constrained at 0.5 Check  
PLAT300\_ALERT\_4\_G Atom Site Occupancy of C22 Constrained at 0.5 Check  
PLAT300\_ALERT\_4\_G Atom Site Occupancy of C23 Constrained at 0.5 Check  
PLAT300\_ALERT\_4\_G Atom Site Occupancy of C24 Constrained at 0.5 Check  
PLAT300\_ALERT\_4\_G Atom Site Occupancy of C25 Constrained at 0.5 Check  
PLAT300\_ALERT\_4\_G Atom Site Occupancy of H22A Constrained at 0.5 Check  
PLAT300\_ALERT\_4\_G Atom Site Occupancy of H22B Constrained at 0.5 Check  
PLAT300\_ALERT\_4\_G Atom Site Occupancy of H23A Constrained at 0.5 Check  
PLAT300\_ALERT\_4\_G Atom Site Occupancy of H23B Constrained at 0.5 Check  
PLAT300\_ALERT\_4\_G Atom Site Occupancy of H24A Constrained at 0.5 Check  
PLAT300\_ALERT\_4\_G Atom Site Occupancy of H24B Constrained at 0.5 Check  
PLAT300\_ALERT\_4\_G Atom Site Occupancy of H25A Constrained at 0.5 Check  
PLAT300\_ALERT\_4\_G Atom Site Occupancy of H25B Constrained at 0.5 Check  
PLAT302\_ALERT\_4\_G Anion/Solvent/Minor-Residue Disorder (Resd 2 ) 100% Note  
PLAT304\_ALERT\_4\_G Non-Integer Number of Atoms in ..... (Resd 2 ) 6.50 Check  
PLAT395\_ALERT\_2\_G Deviating X-O-Y Angle From 120 for O1 . 139.9 Degree  
PLAT395\_ALERT\_2\_G Deviating X-O-Y Angle From 120 for O2 . 141.7 Degree  
PLAT395\_ALERT\_2\_G Deviating X-O-Y Angle From 120 for O3 . 134.2 Degree  
PLAT398\_ALERT\_2\_G Deviating C-O-C Angle From 120 for O4 . 104.4 Degree  
PLAT432\_ALERT\_2\_G Short Inter X...Y Contact Si1 ..04 . 3.39 Ang.  
x,y,l+z = 1\_556 Check  
PLAT789\_ALERT\_4\_G Atoms with Negative \_atom\_site\_disorder\_group # 13 Check  
PLAT860\_ALERT\_3\_G Number of Least-Squares Restraints ..... 4 Note  
PLAT883\_ALERT\_1\_G No Info/Value for \_atom\_sites\_solution\_primary . Please Do !  
PLAT910\_ALERT\_3\_G Missing # of FCF Reflection(s) Below Theta(Min). 3 Note  
PLAT913\_ALERT\_3\_G Missing # of Very Strong Reflections in FCF .... 1 Note  
PLAT941\_ALERT\_3\_G Average HKL Measurement Multiplicity ..... 4.3 Low  
PLAT961\_ALERT\_5\_G Dataset Contains no Negative Intensities ..... Please Check  
PLAT967\_ALERT\_5\_G Note: Two-Theta Cutoff Value in Embedded .res .. 56.0 Degree  
PLAT978\_ALERT\_2\_G Number C-C Bonds with Positive Residual Density. 4 Info

- 
- 0 **ALERT level A** = Most likely a serious problem - resolve or explain  
0 **ALERT level B** = A potentially serious problem, consider carefully  
1 **ALERT level C** = Check. Ensure it is not caused by an omission or oversight  
31 **ALERT level G** = General information/check it is not something unexpected



1 ALERT type 1 CIF construction/syntax error, inconsistent or missing data  
7 ALERT type 2 Indicator that the structure model may be wrong or deficient  
5 ALERT type 3 Indicator that the structure quality may be low  
17 ALERT type 4 Improvement, methodology, query or suggestion  
2 ALERT type 5 Informative message, check

---

## Datablock: pd\_si03\_01

---

Bond precision: C-C = 0.0046 A Wavelength=0.71073

Cell: a=15.3617(7) b=8.6072(5) c=16.3936(7)  
alpha=90 beta=90 gamma=90

Temperature: 200 K

|                        | Calculated             | Reported               |
|------------------------|------------------------|------------------------|
| Volume                 | 2167.58(19)            | 2167.58(18)            |
| Space group            | P c a 21               | P c a 21               |
| Hall group             | P 2c -2ac              | P 2c -2ac              |
| Moiety formula         | C22 H19 Cl Cu N3 O3 Si | C22 H19 Cl Cu N3 O3 Si |
| Sum formula            | C22 H19 Cl Cu N3 O3 Si | C22 H19 Cl Cu N3 O3 Si |
| Mr                     | 500.49                 | 500.48                 |
| Dx, g cm <sup>-3</sup> | 1.534                  | 1.534                  |
| Z                      | 4                      | 4                      |
| Mu (mm <sup>-1</sup> ) | 1.216                  | 1.216                  |
| F000                   | 1024.0                 | 1024.0                 |
| F000'                  | 1026.50                |                        |
| h, k, lmax             | 20, 11, 21             | 20, 11, 21             |
| Nref                   | 5247[ 2717]            | 5100                   |
| Tmin, Tmax             | 0.747, 0.833           | 0.765, 0.841           |
| Tmin'                  | 0.694                  |                        |

Correction method= # Reported T Limits: Tmin=0.765 Tmax=0.841  
AbsCorr = INTEGRATION

Data completeness= 1.88/0.97 Theta(max)= 27.998

R(reflections)= 0.0235( 4772) wR2(reflections)=  
0.0583( 5100)

S = 1.087 Npar= 280

---



The following ALERTS were generated. Each ALERT has the format

**test-name\_ALERT\_alert-type\_alert-level.**

Click on the hyperlinks for more details of the test.

---

### Alert level G

|                   |                                                  |                       |       |              |          |
|-------------------|--------------------------------------------------|-----------------------|-------|--------------|----------|
| PLAT232_ALERT_2_G | Hirshfeld Test Diff (M-X)                        | Cu1                   | --Cl1 | .            | 5.2 s.u. |
| PLAT232_ALERT_2_G | Hirshfeld Test Diff (M-X)                        | Cu1                   | --N3  | .            | 5.7 s.u. |
| PLAT395_ALERT_2_G | Deviating X-O-Y                                  | Angle From 120 for O1 | .     | 135.2 Degree |          |
| PLAT395_ALERT_2_G | Deviating X-O-Y                                  | Angle From 120 for O2 | .     | 135.0 Degree |          |
| PLAT395_ALERT_2_G | Deviating X-O-Y                                  | Angle From 120 for O3 | .     | 132.8 Degree |          |
| PLAT883_ALERT_1_G | No Info/Value for _atom_sites_solution_primary   | .                     |       | Please Do !  |          |
| PLAT910_ALERT_3_G | Missing # of FCF Reflection(s) Below Theta(Min). |                       |       | 3 Note       |          |
| PLAT913_ALERT_3_G | Missing # of Very Strong Reflections in FCF .... |                       |       | 1 Note       |          |
| PLAT961_ALERT_5_G | Dataset Contains no Negative Intensities .....   |                       |       | Please Check |          |
| PLAT967_ALERT_5_G | Note: Two-Theta Cutoff Value in Embedded .res .. |                       |       | 56.0 Degree  |          |
| PLAT978_ALERT_2_G | Number C-C Bonds with Positive Residual Density. |                       |       | 7 Info       |          |

---

0 **ALERT level A** = Most likely a serious problem - resolve or explain  
0 **ALERT level B** = A potentially serious problem, consider carefully  
0 **ALERT level C** = Check. Ensure it is not caused by an omission or oversight  
11 **ALERT level G** = General information/check it is not something unexpected

1 ALERT type 1 CIF construction/syntax error, inconsistent or missing data  
6 ALERT type 2 Indicator that the structure model may be wrong or deficient  
2 ALERT type 3 Indicator that the structure quality may be low  
0 ALERT type 4 Improvement, methodology, query or suggestion  
2 ALERT type 5 Informative message, check

---

## Datablock: JW1132\_01

---

|                 |                  |                    |             |
|-----------------|------------------|--------------------|-------------|
| Bond precision: | Cu-Cl = 0.0006 A | Wavelength=0.71073 |             |
| Cell:           | a=9.0369(2)      | b=23.5711(6)       | c=9.6583(2) |
|                 | alpha=90         | beta=108.839(2)    | gamma=90    |
| Temperature:    | 200 K            |                    |             |



|                   |                                                  |       |        |
|-------------------|--------------------------------------------------|-------|--------|
| PLAT002_ALERT_2_G | Number of Distance or Angle Restraints on AtSite | 27    | Note   |
| PLAT171_ALERT_4_G | The CIF-Embedded .res File Contains EADP Records | 25    | Report |
| PLAT174_ALERT_4_G | The CIF-Embedded .res File Contains FLAT Records | 3     | Report |
| PLAT176_ALERT_4_G | The CIF-Embedded .res File Contains SADI Records | 13    | Report |
| PLAT232_ALERT_2_G | Hirshfeld Test Diff (M-X) Cul --Cll .            | 5.7   | s.u.   |
| PLAT301_ALERT_3_G | Main Residue Disorder .....(Resd 1 )             | 93%   | Note   |
| PLAT395_ALERT_2_G | Deviating X-O-Y Angle From 120 for O1 .          | 137.2 | Degree |
| PLAT395_ALERT_2_G | Deviating X-O-Y Angle From 120 for O2 .          | 144.9 | Degree |
| PLAT395_ALERT_2_G | Deviating X-O-Y Angle From 120 for O3 .          | 138.8 | Degree |
| PLAT395_ALERT_2_G | Deviating X-O-Y Angle From 120 for O2A .         | 149.5 | Degree |
| PLAT395_ALERT_2_G | Deviating X-O-Y Angle From 120 for O3A .         | 148.1 | Degree |
| PLAT811_ALERT_5_G | No ADDSYM Analysis: Too Many Excluded Atoms .... | !     | Info   |
| PLAT860_ALERT_3_G | Number of Least-Squares Restraints .....         | 27    | Note   |



PLAT961\_ALERT\_5\_G Dataset Contains no Negative Intensities ..... Please Check  
PLAT967\_ALERT\_5\_G Note: Two-Theta Cutoff Value in Embedded .res .. 56.0 Degree

---

0 **ALERT level A** = Most likely a serious problem - resolve or explain  
0 **ALERT level B** = A potentially serious problem, consider carefully  
1 **ALERT level C** = Check. Ensure it is not caused by an omission or oversight  
15 **ALERT level G** = General information/check it is not something unexpected

0 ALERT type 1 CIF construction/syntax error, inconsistent or missing data  
7 ALERT type 2 Indicator that the structure model may be wrong or deficient  
3 ALERT type 3 Indicator that the structure quality may be low  
3 ALERT type 4 Improvement, methodology, query or suggestion  
3 ALERT type 5 Informative message, check

---

## Datablock: JW1132\_03

---

Bond precision: C-C = 0.0031 A Wavelength=0.71073

Cell: a=8.7413(3) b=10.4028(3) c=10.7168(3)  
alpha=80.052(3) beta=80.903(2) gamma=89.273(3)  
Temperature: 180 K

|                | Calculated             | Reported               |
|----------------|------------------------|------------------------|
| Volume         | 947.69(5)              | 947.69(5)              |
| Space group    | P -1                   | P -1                   |
| Hall group     | -P 1                   | -P 1                   |
| Moiety formula | C18 H17 Cl Cu N3 O3 Si | C18 H17 Cl Cu N3 O3 Si |
| Sum formula    | C18 H17 Cl Cu N3 O3 Si | C18 H17 Cl Cu N3 O3 Si |
| Mr             | 450.44                 | 450.42                 |
| Dx, g cm-3     | 1.579                  | 1.578                  |
| Z              | 2                      | 2                      |
| Mu (mm-1)      | 1.381                  | 1.381                  |
| F000           | 460.0                  | 460.0                  |
| F000'          | 461.23                 |                        |
| h, k, lmax     | 11, 13, 14             | 11, 13, 14             |
| Nref           | 4570                   | 4570                   |
| Tmin, Tmax     | 0.725, 0.871           | 0.747, 0.876           |
| Tmin'          | 0.654                  |                        |

Correction method= # Reported T Limits: Tmin=0.747 Tmax=0.876  
AbsCorr = INTEGRATION

Data completeness= 1.000 Theta(max)= 27.993



R(reflections)= 0.0303( 4149)

wR2(reflections)=  
0.0753( 4570)

S = 1.101

Npar= 244

---

The following ALERTS were generated. Each ALERT has the format

**test-name\_ALERT\_alert-type\_alert-level.**

Click on the hyperlinks for more details of the test.

---

### Alert level G

|                   |                                                  |   |              |
|-------------------|--------------------------------------------------|---|--------------|
| PLAT232_ALERT_2_G | Hirshfeld Test Diff (M-X) Cu1 --N2               | . | 11.3 s.u.    |
| PLAT395_ALERT_2_G | Deviating X-O-Y Angle From 120 for O1            | . | 135.5 Degree |
| PLAT395_ALERT_2_G | Deviating X-O-Y Angle From 120 for O2            | . | 131.0 Degree |
| PLAT794_ALERT_5_G | Tentative Bond Valency for Cu1 (I)               | . | 1.03 Info    |
| PLAT913_ALERT_3_G | Missing # of Very Strong Reflections in FCF .... |   | 1 Note       |
| PLAT941_ALERT_3_G | Average HKL Measurement Multiplicity .....       |   | 4.2 Low      |
| PLAT961_ALERT_5_G | Dataset Contains no Negative Intensities .....   |   | Please Check |
| PLAT967_ALERT_5_G | Note: Two-Theta Cutoff Value in Embedded .res .. |   | 56.0 Degree  |
| PLAT978_ALERT_2_G | Number C-C Bonds with Positive Residual Density. |   | 11 Info      |

---

0 **ALERT level A** = Most likely a serious problem - resolve or explain  
0 **ALERT level B** = A potentially serious problem, consider carefully  
0 **ALERT level C** = Check. Ensure it is not caused by an omission or oversight  
9 **ALERT level G** = General information/check it is not something unexpected

0 ALERT type 1 CIF construction/syntax error, inconsistent or missing data  
4 ALERT type 2 Indicator that the structure model may be wrong or deficient  
2 ALERT type 3 Indicator that the structure quality may be low  
0 ALERT type 4 Improvement, methodology, query or suggestion  
3 ALERT type 5 Informative message, check

---

## Datablock: jw1110\_02

---

Bond precision: C-C = 0.0036 A

Wavelength=0.71073

Cell: a=15.7556(8) b=18.2565(7) c=17.2013(6)  
alpha=90 beta=90 gamma=90

Temperature: 200 K



|                   |                                                  |   |              |
|-------------------|--------------------------------------------------|---|--------------|
| PLAT395_ALERT_2_G | Deviating X-O-Y Angle From 120 for O1            | . | 130.5 Degree |
| PLAT395_ALERT_2_G | Deviating X-O-Y Angle From 120 for O2            | . | 132.3 Degree |
| PLAT395_ALERT_2_G | Deviating X-O-Y Angle From 120 for O4            | . | 130.4 Degree |
| PLAT883_ALERT_1_G | No Info/Value for _atom_sites_solution_primary   | . | Please Do !  |
| PLAT912_ALERT_4_G | Missing # of FCF Reflections Above Sth/L= 0.600  |   | 2 Note       |
| PLAT913_ALERT_3_G | Missing # of Very Strong Reflections in FCF .... |   | 1 Note       |
| PLAT941_ALERT_3_G | Average HKL Measurement Multiplicity .....       |   | 4.4 Low      |
| PLAT961_ALERT_5_G | Dataset Contains no Negative Intensities .....   |   | Please Check |
| PLAT965_ALERT_2_G | The SHELXL WEIGHT Optimisation has not Converged |   | Please Check |
| PLAT967_ALERT_5_G | Note: Two-Theta Cutoff Value in Embedded .res .. |   | 56.0 Degree  |
| PLAT978_ALERT_2_G | Number C-C Bonds with Positive Residual Density. |   | 9 Info       |



---

0 **ALERT level A** = Most likely a serious problem - resolve or explain  
 0 **ALERT level B** = A potentially serious problem, consider carefully  
 3 **ALERT level C** = Check. Ensure it is not caused by an omission or oversight  
 11 **ALERT level G** = General information/check it is not something unexpected

1 ALERT type 1 CIF construction/syntax error, inconsistent or missing data  
 5 ALERT type 2 Indicator that the structure model may be wrong or deficient  
 5 ALERT type 3 Indicator that the structure quality may be low  
 1 ALERT type 4 Improvement, methodology, query or suggestion  
 2 ALERT type 5 Informative message, check

---

## Datablock: pd\_si03l\_01

---

Bond precision: C-C = 0.0036 A Wavelength=0.71073  
 Cell: a=15.8215(9) b=9.8221(4) c=17.4885(10)  
 alpha=90 beta=109.961(4) gamma=90  
 Temperature: 200 K

|                        | Calculated             | Reported               |
|------------------------|------------------------|------------------------|
| Volume                 | 2554.5(2)              | 2554.5(2)              |
| Space group            | P 21/c                 | P 21/c                 |
| Hall group             | -P 2ybc                | -P 2ybc                |
| Moiety formula         | C27 H23 Cl Cu N4 O4 Si | C27 H23 Cl Cu N4 O4 Si |
| Sum formula            | C27 H23 Cl Cu N4 O4 Si | C27 H23 Cl Cu N4 O4 Si |
| Mr                     | 594.58                 | 594.57                 |
| Dx, g cm <sup>-3</sup> | 1.546                  | 1.546                  |
| Z                      | 4                      | 4                      |
| Mu (mm <sup>-1</sup> ) | 1.049                  | 1.049                  |
| F000                   | 1220.0                 | 1220.0                 |
| F000'                  | 1222.59                |                        |
| h, k, lmax             | 19, 12, 21             | 19, 12, 21             |
| Nref                   | 5020                   | 5012                   |
| Tmin, Tmax             | 0.828, 0.900           | 0.832, 0.929           |
| Tmin'                  | 0.730                  |                        |

Correction method= # Reported T Limits: Tmin=0.832 Tmax=0.929  
 AbsCorr = INTEGRATION

Data completeness= 0.998 Theta(max)= 26.000

R(reflections)= 0.0291( 4064) wR2(reflections)=  
 0.0747( 5012)  
 S = 1.081 Npar= 343



---

The following ALERTS were generated. Each ALERT has the format

**test-name\_ALERT\_alert-type\_alert-level.**

Click on the hyperlinks for more details of the test.

---

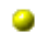

#### Alert level C

|                   |                                                  |   |       |
|-------------------|--------------------------------------------------|---|-------|
| PLAT910_ALERT_3_C | Missing # of FCF Reflection(s) Below Theta(Min). | 7 | Note  |
| PLAT934_ALERT_3_C | Number of (Iobs-Icalc)/Sigma(W) > 10 Outliers .. | 1 | Check |

---

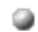

#### Alert level G

|                   |                                                  |       |              |
|-------------------|--------------------------------------------------|-------|--------------|
| PLAT232_ALERT_2_G | Hirshfeld Test Diff (M-X) Cu1 --Si1 .            | 8.3   | s.u.         |
| PLAT395_ALERT_2_G | Deviating X-O-Y Angle From 120 for O1 .          | 130.7 | Degree       |
| PLAT883_ALERT_1_G | No Info/Value for _atom_sites_solution_primary . |       | Please Do !  |
| PLAT913_ALERT_3_G | Missing # of Very Strong Reflections in FCF .... | 2     | Note         |
| PLAT961_ALERT_5_G | Dataset Contains no Negative Intensities .....   |       | Please Check |
| PLAT967_ALERT_5_G | Note: Two-Theta Cutoff Value in Embedded .res .. | 52.0  | Degree       |
| PLAT978_ALERT_2_G | Number C-C Bonds with Positive Residual Density. | 5     | Info         |

---

0 **ALERT level A** = Most likely a serious problem - resolve or explain  
0 **ALERT level B** = A potentially serious problem, consider carefully  
2 **ALERT level C** = Check. Ensure it is not caused by an omission or oversight  
7 **ALERT level G** = General information/check it is not something unexpected

1 ALERT type 1 CIF construction/syntax error, inconsistent or missing data  
3 ALERT type 2 Indicator that the structure model may be wrong or deficient  
3 ALERT type 3 Indicator that the structure quality may be low  
0 ALERT type 4 Improvement, methodology, query or suggestion  
2 ALERT type 5 Informative message, check

---

## Datablock: JW1132\_02

---

Bond precision: C-C = 0.0042 A

Wavelength=0.71073

Cell: a=15.2140(3) b=9.6459(2) c=17.0865(3)

alpha=90 beta=108.677(1) gamma=90

Temperature: 200 K



|                   |                                                  |      |              |
|-------------------|--------------------------------------------------|------|--------------|
| PLAT002_ALERT_2_G | Number of Distance or Angle Restraints on AtSite | 6    | Note         |
| PLAT168_ALERT_4_G | The CIF-Embedded .res File Contains EXYZ Records | 1    | Report       |
| PLAT171_ALERT_4_G | The CIF-Embedded .res File Contains EADP Records | 1    | Report       |
| PLAT176_ALERT_4_G | The CIF-Embedded .res File Contains SADI Records | 2    | Report       |
| PLAT232_ALERT_2_G | Hirshfeld Test Diff (M-X) Cul --Sil .            | 5.0  | s.u.         |
| PLAT301_ALERT_3_G | Main Residue Disorder .....(Resd 1 )             | 9%   | Note         |
| PLAT860_ALERT_3_G | Number of Least-Squares Restraints .....         | 2    | Note         |
| PLAT961_ALERT_5_G | Dataset Contains no Negative Intensities .....   |      | Please Check |
| PLAT967_ALERT_5_G | Note: Two-Theta Cutoff Value in Embedded .res .. | 52.0 | Degree       |
| PLAT978_ALERT_2_G | Number C-C Bonds with Positive Residual Density. | 4    | Info         |



---

0 **ALERT level A** = Most likely a serious problem - resolve or explain  
 0 **ALERT level B** = A potentially serious problem, consider carefully  
 3 **ALERT level C** = Check. Ensure it is not caused by an omission or oversight  
 10 **ALERT level G** = General information/check it is not something unexpected

0 ALERT type 1 CIF construction/syntax error, inconsistent or missing data  
 5 ALERT type 2 Indicator that the structure model may be wrong or deficient  
 3 ALERT type 3 Indicator that the structure quality may be low  
 3 ALERT type 4 Improvement, methodology, query or suggestion  
 2 ALERT type 5 Informative message, check

---

## Datablock: as-hiwi-007a\_03

---

Bond precision: C-C = 0.0033 A

Wavelength=0.71073

Cell: a=9.6434(6) b=10.4351(6) c=12.0659(7)  
 alpha=100.595(5) beta=110.075(5) gamma=106.546(5)  
 Temperature: 180 K

|                        | Calculated                | Reported                  |
|------------------------|---------------------------|---------------------------|
| Volume                 | 1038.34(13)               | 1038.34(12)               |
| Space group            | P -1                      | P -1                      |
| Hall group             | -P 1                      | -P 1                      |
| Moiety formula         | C44 H36 Cl2 Cu2 N4 O4 Si2 | C44 H36 Cl2 Cu2 N4 O4 Si2 |
| Sum formula            | C44 H36 Cl2 Cu2 N4 O4 Si2 | C44 H36 Cl2 Cu2 N4 O4 Si2 |
| Mr                     | 938.95                    | 938.93                    |
| Dx, g cm <sup>-3</sup> | 1.502                     | 1.502                     |
| Z                      | 1                         | 1                         |
| Mu (mm <sup>-1</sup> ) | 1.259                     | 1.259                     |
| F000                   | 480.0                     | 480.0                     |
| F000'                  | 481.23                    |                           |
| h, k, lmax             | 12, 13, 15                | 12, 13, 15                |
| Nref                   | 5009                      | 5010                      |
| Tmin, Tmax             | 0.710, 0.797              | 0.776, 0.909              |
| Tmin'                  | 0.696                     |                           |

Correction method= # Reported T Limits: Tmin=0.776 Tmax=0.909  
 AbsCorr = INTEGRATION

Data completeness= 1.000

Theta(max)= 27.996

R(reflections)= 0.0334( 4492)

wR2(reflections)=  
 0.0865( 5010)

S = 1.072

Npar= 262



---

The following ALERTS were generated. Each ALERT has the format

**test-name\_ALERT\_alert-type\_alert-level.**

Click on the hyperlinks for more details of the test.

---



#### **Alert level C**

PLAT094\_ALERT\_2\_C Ratio of Maximum / Minimum Residual Density .... 2.01 Report

---

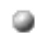

#### **Alert level G**

PLAT154\_ALERT\_1\_G The s.u.'s on the Cell Angles are Equal ..(Note) 0.005 Degree  
PLAT232\_ALERT\_2\_G Hirshfeld Test Diff (M-X) Cu1 --Cl1 . 20.5 s.u.  
PLAT232\_ALERT\_2\_G Hirshfeld Test Diff (M-X) Cu1 --Cl1\_a . 50.5 s.u.  
PLAT395\_ALERT\_2\_G Deviating X-O-Y Angle From 120 for O1 . 131.9 Degree  
PLAT395\_ALERT\_2\_G Deviating X-O-Y Angle From 120 for O2 . 131.4 Degree  
PLAT941\_ALERT\_3\_G Average HKL Measurement Multiplicity ..... 3.3 Low  
PLAT961\_ALERT\_5\_G Dataset Contains no Negative Intensities ..... Please Check  
PLAT967\_ALERT\_5\_G Note: Two-Theta Cutoff Value in Embedded .res .. 56.0 Degree  
PLAT978\_ALERT\_2\_G Number C-C Bonds with Positive Residual Density. 13 Info

---

0 **ALERT level A** = Most likely a serious problem - resolve or explain  
0 **ALERT level B** = A potentially serious problem, consider carefully  
1 **ALERT level C** = Check. Ensure it is not caused by an omission or oversight  
9 **ALERT level G** = General information/check it is not something unexpected

1 ALERT type 1 CIF construction/syntax error, inconsistent or missing data  
6 ALERT type 2 Indicator that the structure model may be wrong or deficient  
1 ALERT type 3 Indicator that the structure quality may be low  
0 ALERT type 4 Improvement, methodology, query or suggestion  
2 ALERT type 5 Informative message, check

---

## **Datablock: JW1144a\_01\_sq\_sq**

---

Bond precision: C-C = 0.0033 A

Wavelength=0.71073

Cell: a=9.6236(3) b=12.6110(4) c=12.8592(4)  
alpha=110.726(2) beta=107.692(2) gamma=98.836(2)  
Temperature: 180 K



|                        | Calculated                               | Reported                                  |
|------------------------|------------------------------------------|-------------------------------------------|
| Volume                 | 1329.53(8)                               | 1329.53(8)                                |
| Space group            | P -1                                     | P -1                                      |
| Hall group             | -P 1                                     | -P 1                                      |
| Moiety formula         | C44 H36 Cl4 Cu4 N4 O4 Si2<br>[+ solvent] | C44 H36 Cl4 Cu4 N4 O4 Si2,<br>2 (C4 H8 O) |
| Sum formula            | C44 H36 Cl4 Cu4 N4 O4 Si2<br>[+ solvent] | C52 H52 Cl4 Cu4 N4 O6 Si2                 |
| Mr                     | 1136.95                                  | 1281.11                                   |
| Dx, g cm <sup>-3</sup> | 1.420                                    | 1.600                                     |
| Z                      | 1                                        | 1                                         |
| Mu (mm <sup>-1</sup> ) | 1.864                                    | 1.877                                     |
| F000                   | 572.0                                    | 652.0                                     |
| F000'                  | 574.16                                   |                                           |
| h,k,lmax               | 12,16,16                                 | 12,16,16                                  |
| Nref                   | 6424                                     | 6424                                      |
| Tmin,Tmax              | 0.668,0.713                              | 0.717,0.758                               |
| Tmin'                  | 0.655                                    |                                           |

Correction method= # Reported T Limits: Tmin=0.717 Tmax=0.758

AbsCorr = INTEGRATION

Data completeness= 1.000

Theta(max)= 27.996

R(reflections)= 0.0346( 5224)

wR2(reflections)=  
0.0876( 6424)

S = 1.038

Npar= 316

The following ALERTS were generated. Each ALERT has the format

**test-name\_ALERT\_alert-type\_alert-level.**

Click on the hyperlinks for more details of the test.

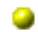

#### Alert level C

PLAT906\_ALERT\_3\_C Large K Value in the Analysis of Variance .....

2.554 Check

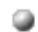

#### Alert level G

FORMU01\_ALERT\_2\_G There is a discrepancy between the atom counts in the

\_chemical\_formula\_sum and the formula from the \_atom\_site\* data.

Atom count from \_chemical\_formula\_sum: C52 H52 Cl4 Cu4 N4 O6 Si2

Atom count from the \_atom\_site data: C44 H36 Cl4 Cu4 N4 O4 Si2

CELLZ01\_ALERT\_1\_G Difference between formula and atom\_site contents detected.

CELLZ01\_ALERT\_1\_G ALERT: Large difference may be due to a

symmetry error - see SYMMG tests

From the CIF: \_cell\_formula\_units\_Z 1

From the CIF: \_chemical\_formula\_sum C52 H52 Cl4 Cu4 N4 O6 Si2

TEST: Compare cell contents of formula and atom\_site data



| atom | Z*formula | cif sites | diff  |
|------|-----------|-----------|-------|
| C    | 52.00     | 44.00     | 8.00  |
| H    | 52.00     | 36.00     | 16.00 |
| Cl   | 4.00      | 4.00      | 0.00  |
| Cu   | 4.00      | 4.00      | 0.00  |
| N    | 4.00      | 4.00      | 0.00  |
| O    | 6.00      | 4.00      | 2.00  |
| Si   | 2.00      | 2.00      | 0.00  |

  

|                   |                                                  |                |              |
|-------------------|--------------------------------------------------|----------------|--------------|
| PLAT041_ALERT_1_G | Calc. and Reported SumFormula                    | Strings Differ | Please Check |
| PLAT154_ALERT_1_G | The s.u.'s on the Cell Angles are Equal ..(Note) |                | 0.002 Degree |
| PLAT300_ALERT_4_G | Atom Site Occupancy of Cu1                       | Constrained at | 0.5 Check    |
| PLAT300_ALERT_4_G | Atom Site Occupancy of Cu2                       | Constrained at | 0.5 Check    |
| PLAT300_ALERT_4_G | Atom Site Occupancy of Cu3                       | Constrained at | 0.5 Check    |
| PLAT300_ALERT_4_G | Atom Site Occupancy of Cu4                       | Constrained at | 0.5 Check    |
| PLAT300_ALERT_4_G | Atom Site Occupancy of Cl1                       | Constrained at | 0.5 Check    |
| PLAT300_ALERT_4_G | Atom Site Occupancy of Cl2                       | Constrained at | 0.5 Check    |
| PLAT300_ALERT_4_G | Atom Site Occupancy of Cl3                       | Constrained at | 0.5 Check    |
| PLAT300_ALERT_4_G | Atom Site Occupancy of Cl4                       | Constrained at | 0.5 Check    |
| PLAT301_ALERT_3_G | Main Residue Disorder .....(Resd 1 )             |                | 13% Note     |
| PLAT605_ALERT_4_G | Largest Solvent Accessible VOID in the Structure |                | 271 A**3     |
| PLAT789_ALERT_4_G | Atoms with Negative _atom_site_disorder_group #  |                | 8 Check      |
| PLAT869_ALERT_4_G | ALERTS Related to the Use of SQUEEZE Suppressed  |                | ! Info       |
| PLAT941_ALERT_3_G | Average HKL Measurement Multiplicity .....       |                | 4.0 Low      |
| PLAT961_ALERT_5_G | Dataset Contains no Negative Intensities .....   | Please Check   |              |
| PLAT967_ALERT_5_G | Note: Two-Theta Cutoff Value in Embedded .res .. |                | 56.0 Degree  |
| PLAT978_ALERT_2_G | Number C-C Bonds with Positive Residual Density. |                | 7 Info       |

---

0 **ALERT level A** = Most likely a serious problem - resolve or explain  
 0 **ALERT level B** = A potentially serious problem, consider carefully  
 1 **ALERT level C** = Check. Ensure it is not caused by an omission or oversight  
 21 **ALERT level G** = General information/check it is not something unexpected

4 ALERT type 1 CIF construction/syntax error, inconsistent or missing data  
 2 ALERT type 2 Indicator that the structure model may be wrong or deficient  
 3 ALERT type 3 Indicator that the structure quality may be low  
 11 ALERT type 4 Improvement, methodology, query or suggestion  
 2 ALERT type 5 Informative message, check

---

## Datablock: JW1144b\_01

---

Bond precision: C-C = 0.0070 A Wavelength=0.71073

Cell: a=8.9766(2) b=19.8415(3) c=13.5256(3)  
 alpha=90 beta=92.846(2) gamma=90

Temperature: 180 K



|                   |                                                  |     |       |   |      |        |
|-------------------|--------------------------------------------------|-----|-------|---|------|--------|
| PLAT002_ALERT_2_G | Number of Distance or Angle Restraints on AtSite |     |       |   | 8    | Note   |
| PLAT171_ALERT_4_G | The CIF-Embedded .res File Contains EADP Records |     |       |   | 2    | Report |
| PLAT176_ALERT_4_G | The CIF-Embedded .res File Contains SADI Records |     |       |   | 2    | Report |
| PLAT232_ALERT_2_G | Hirshfeld Test Diff (M-X)                        | Cu1 | --Cl1 | . | 6.9  | s.u.   |
| PLAT232_ALERT_2_G | Hirshfeld Test Diff (M-X)                        | Cu1 | --Cl2 | . | 33.5 | s.u.   |
| PLAT232_ALERT_2_G | Hirshfeld Test Diff (M-X)                        | Cu2 | --Cl2 | . | 67.7 | s.u.   |
| PLAT232_ALERT_2_G | Hirshfeld Test Diff (M-X)                        | Cu2 | --Cl3 | . | 8.2  | s.u.   |
| PLAT232_ALERT_2_G | Hirshfeld Test Diff (M-X)                        | Cu3 | --Cl2 | . | 18.2 | s.u.   |
| PLAT232_ALERT_2_G | Hirshfeld Test Diff (M-X)                        | Cu3 | --Cl3 | . | 23.0 | s.u.   |
| PLAT302_ALERT_4_G | Anion/Solvent/Minor-Residue Disorder (Resd 2 )   |     |       |   | 100% | Note   |



|                   |                                                  |       |              |
|-------------------|--------------------------------------------------|-------|--------------|
| PLAT302_ALERT_4_G | Anion/Solvent/Minor-Residue Disorder (Resd 3 )   | 100%  | Note         |
| PLAT304_ALERT_4_G | Non-Integer Number of Atoms in ..... (Resd 2 )   | 3.25  | Check        |
| PLAT304_ALERT_4_G | Non-Integer Number of Atoms in ..... (Resd 3 )   | 1.75  | Check        |
| PLAT395_ALERT_2_G | Deviating X-O-Y Angle From 120 for O3 .          | 132.4 | Degree       |
| PLAT395_ALERT_2_G | Deviating X-O-Y Angle From 120 for O4 .          | 130.3 | Degree       |
| PLAT860_ALERT_3_G | Number of Least-Squares Restraints .....         | 32    | Note         |
| PLAT910_ALERT_3_G | Missing # of FCF Reflection(s) Below Theta(Min). | 2     | Note         |
| PLAT933_ALERT_2_G | Number of HKL-OMIT Records in Embedded .res File | 6     | Note         |
| PLAT961_ALERT_5_G | Dataset Contains no Negative Intensities .....   |       | Please Check |
| PLAT967_ALERT_5_G | Note: Two-Theta Cutoff Value in Embedded .res .. | 56.0  | Degree       |
| PLAT978_ALERT_2_G | Number C-C Bonds with Positive Residual Density. | 1     | Info         |

---

0 **ALERT level A** = Most likely a serious problem - resolve or explain  
0 **ALERT level B** = A potentially serious problem, consider carefully  
2 **ALERT level C** = Check. Ensure it is not caused by an omission or oversight  
21 **ALERT level G** = General information/check it is not something unexpected

0 ALERT type 1 CIF construction/syntax error, inconsistent or missing data  
11 ALERT type 2 Indicator that the structure model may be wrong or deficient  
4 ALERT type 3 Indicator that the structure quality may be low  
6 ALERT type 4 Improvement, methodology, query or suggestion  
2 ALERT type 5 Informative message, check

---

## checkCIF publication errors

---

### Alert level A

PUBL004\_ALERT\_1\_A The contact author's name and address are missing,  
\_publ\_contact\_author\_name and \_publ\_contact\_author\_address.  
PUBL005\_ALERT\_1\_A \_publ\_contact\_author\_email, \_publ\_contact\_author\_fax and  
\_publ\_contact\_author\_phone are all missing.  
At least one of these should be present.  
PUBL006\_ALERT\_1\_A \_publ\_requested\_journal is missing  
e.g. 'Acta Crystallographica Section C'  
PUBL008\_ALERT\_1\_A \_publ\_section\_title is missing. Title of paper.  
PUBL009\_ALERT\_1\_A \_publ\_author\_name is missing. List of author(s) name(s).  
PUBL010\_ALERT\_1\_A \_publ\_author\_address is missing. Author(s) address(es).  
PUBL012\_ALERT\_1\_A \_publ\_section\_abstract is missing.  
Abstract of paper in English.

---

### Alert level G

PUBL017\_ALERT\_1\_G The \_publ\_section\_references section is missing or  
empty.

---

7 **ALERT level A** = Data missing that is essential or data in wrong format  
1 **ALERT level G** = General alerts. Data that may be required is missing

---



## Publication of your CIF

You should attempt to resolve as many as possible of the alerts in all categories. Often the minor alerts point to easily fixed oversights, errors and omissions in your CIF or refinement strategy, so attention to these fine details can be worthwhile. In order to resolve some of the more serious problems it may be necessary to carry out additional measurements or structure refinements. However, the nature of your study may justify the reported deviations from journal submission requirements and the more serious of these should be commented upon in the discussion or experimental section of a paper or in the "special\_details" fields of the CIF. *checkCIF* was carefully designed to identify outliers and unusual parameters, but every test has its limitations and alerts that are not important in a particular case may appear. Conversely, the absence of alerts does not guarantee there are no aspects of the results needing attention. It is up to the individual to critically assess their own results and, if necessary, seek expert advice.

If level A alerts remain, which you believe to be justified deviations, and you intend to submit this CIF for publication in a journal, you should additionally insert an explanation in your CIF using the Validation Reply Form (VRF) below. This will allow your explanation to be considered as part of the review process.

## Validation response form

Please find below a validation response form (VRF) that can be filled in and pasted into your CIF.

```
# start Validation Reply Form
_vrf_PUBL004_GLOBAL
;
PROBLEM: The contact author's name and address are missing,
RESPONSE: ...
;
_vrf_PUBL005_GLOBAL
;
PROBLEM: _publ_contact_author_email, _publ_contact_author_fax and
RESPONSE: ...
;
_vrf_PUBL006_GLOBAL
;
PROBLEM: _publ_requested_journal is missing
RESPONSE: ...
;
_vrf_PUBL008_GLOBAL
;
PROBLEM: _publ_section_title is missing. Title of paper.
RESPONSE: ...
;
_vrf_PUBL009_GLOBAL
;
PROBLEM: _publ_author_name is missing. List of author(s) name(s).
RESPONSE: ...
;
_vrf_PUBL010_GLOBAL
;
PROBLEM: _publ_author_address is missing. Author(s) address(es).
```



*i*

```
vrf PUBL012 GLOBAL
```

*i*

PROBLEM: `_publ_section_abstract` is missing.

RESPONSE: . . .

*i*

```
# end Validation Reply Form
```

If you wish to submit your CIF for publication in Acta Crystallographica Section C or E, you should upload your CIF via the web. If you wish to submit your CIF for publication in IUCrData you should upload your CIF via the web. If your CIF is to form part of a submission to another IUCr journal, you will be asked, either during electronic submission or by the Co-editor handling your paper, to upload your CIF via our web site.

**PLATON version of 18/11/2022; check.def file version of 09/08/2022**

**Datablock pd si01 01 - ellipsoid plot**

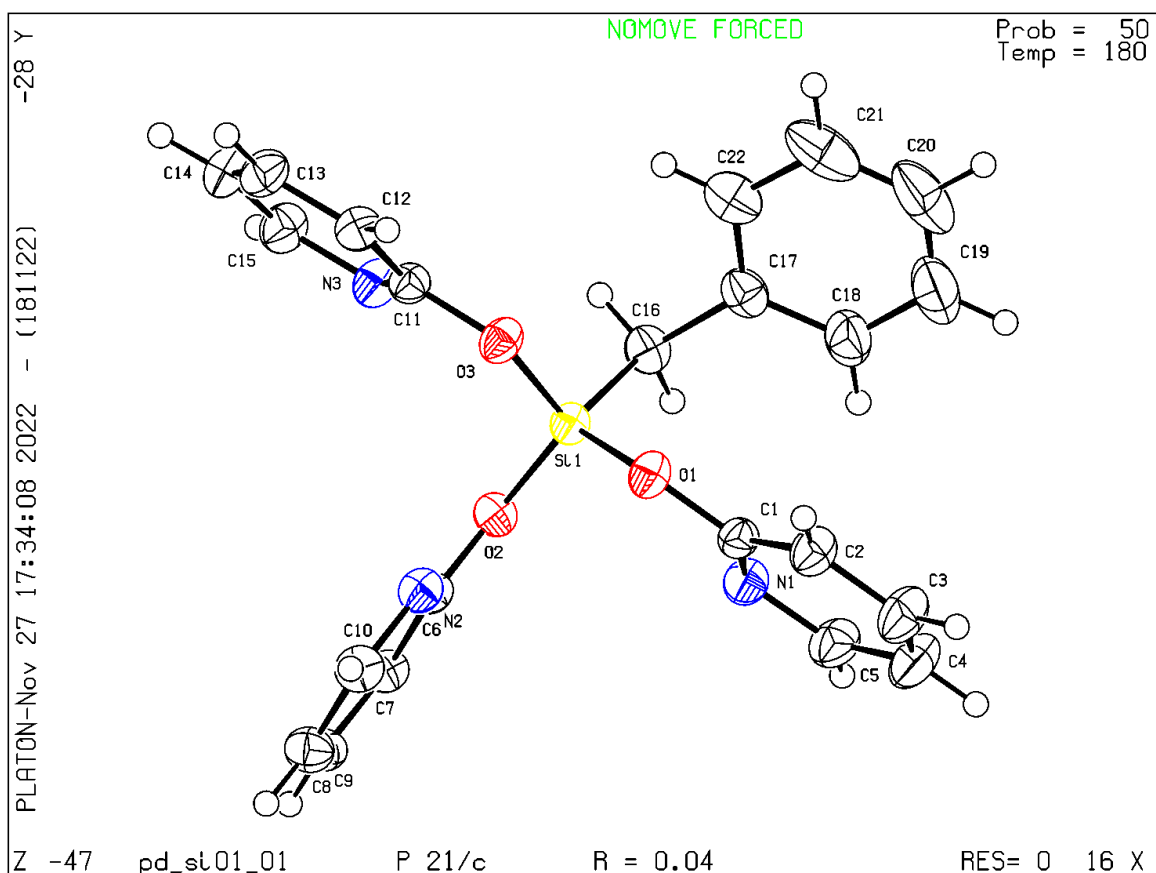



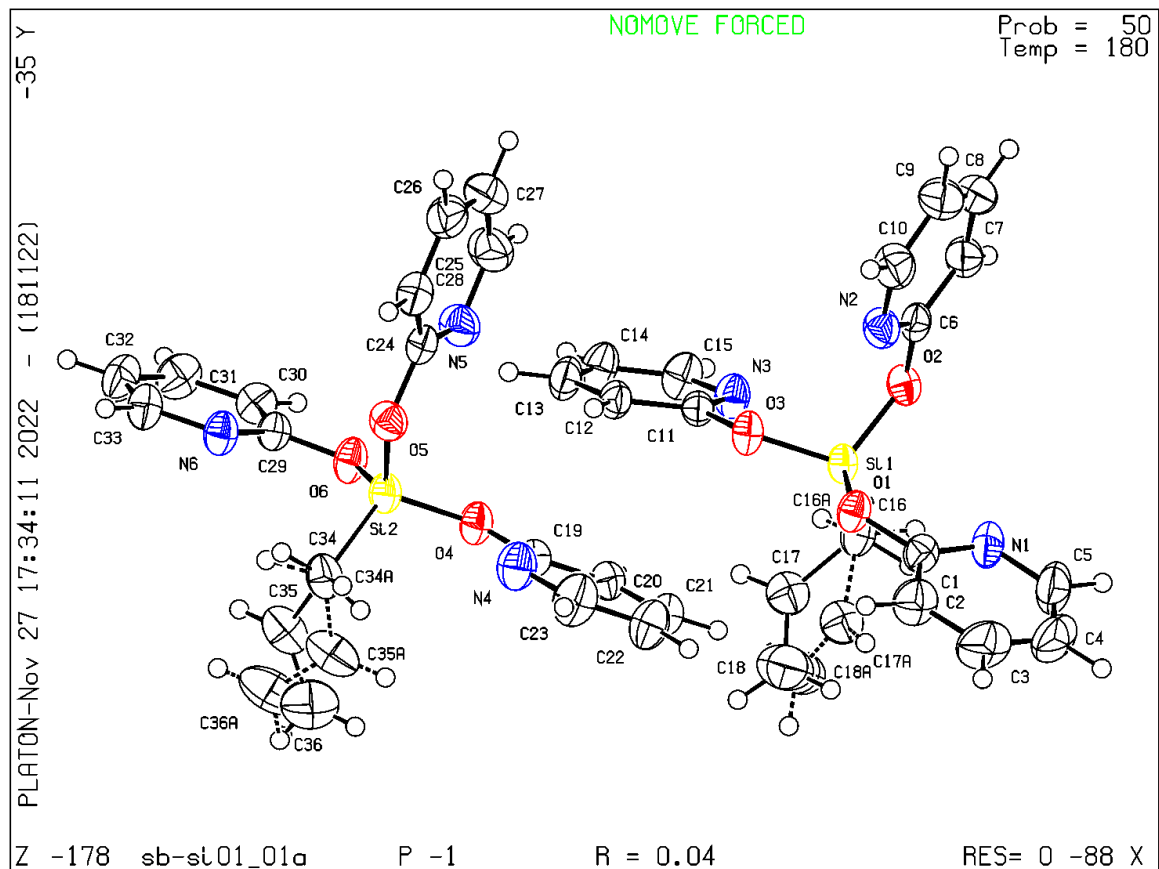



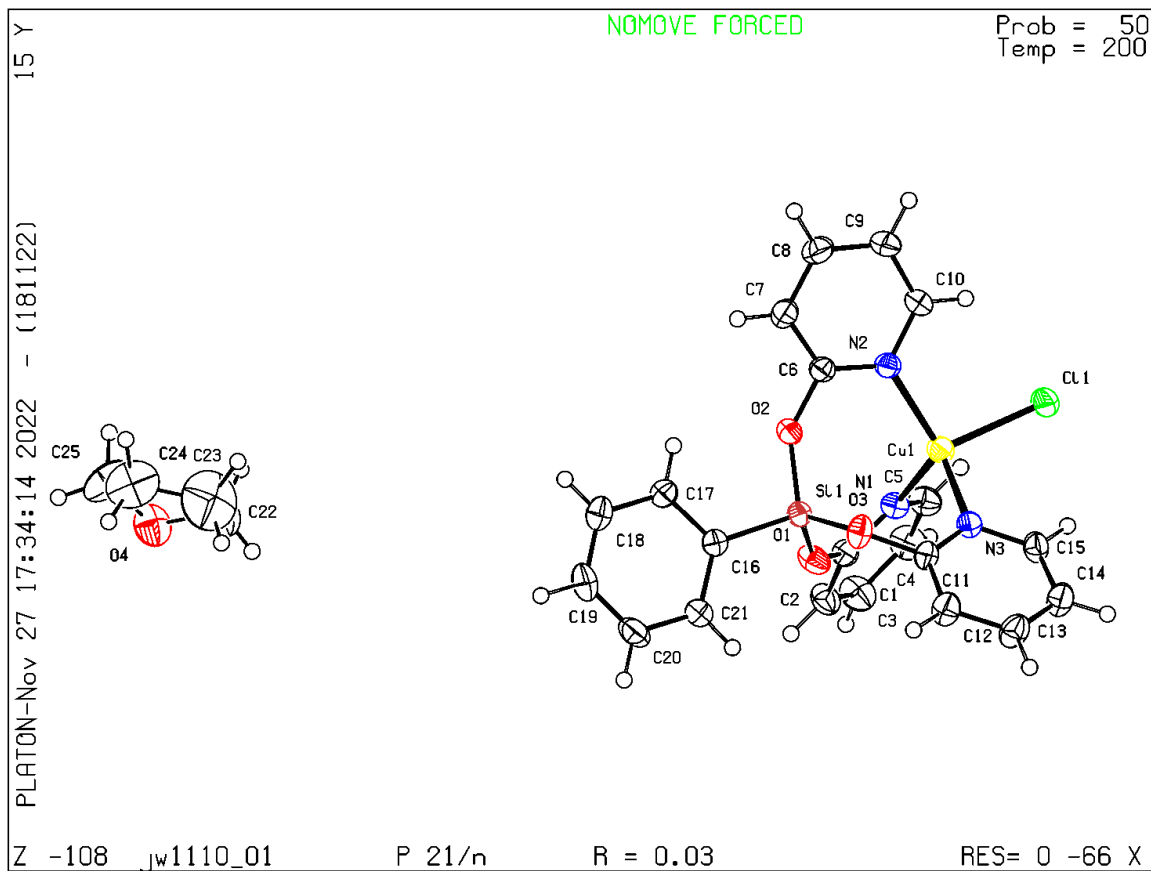



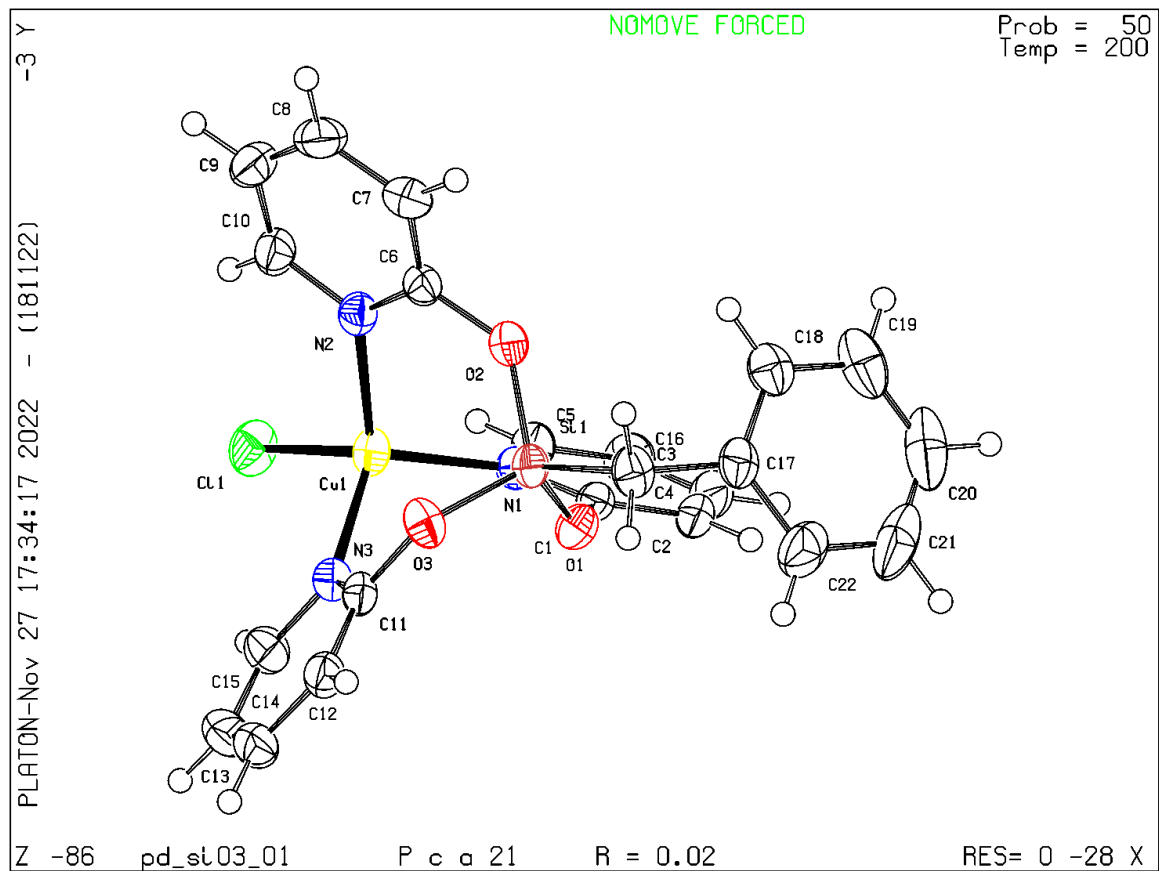



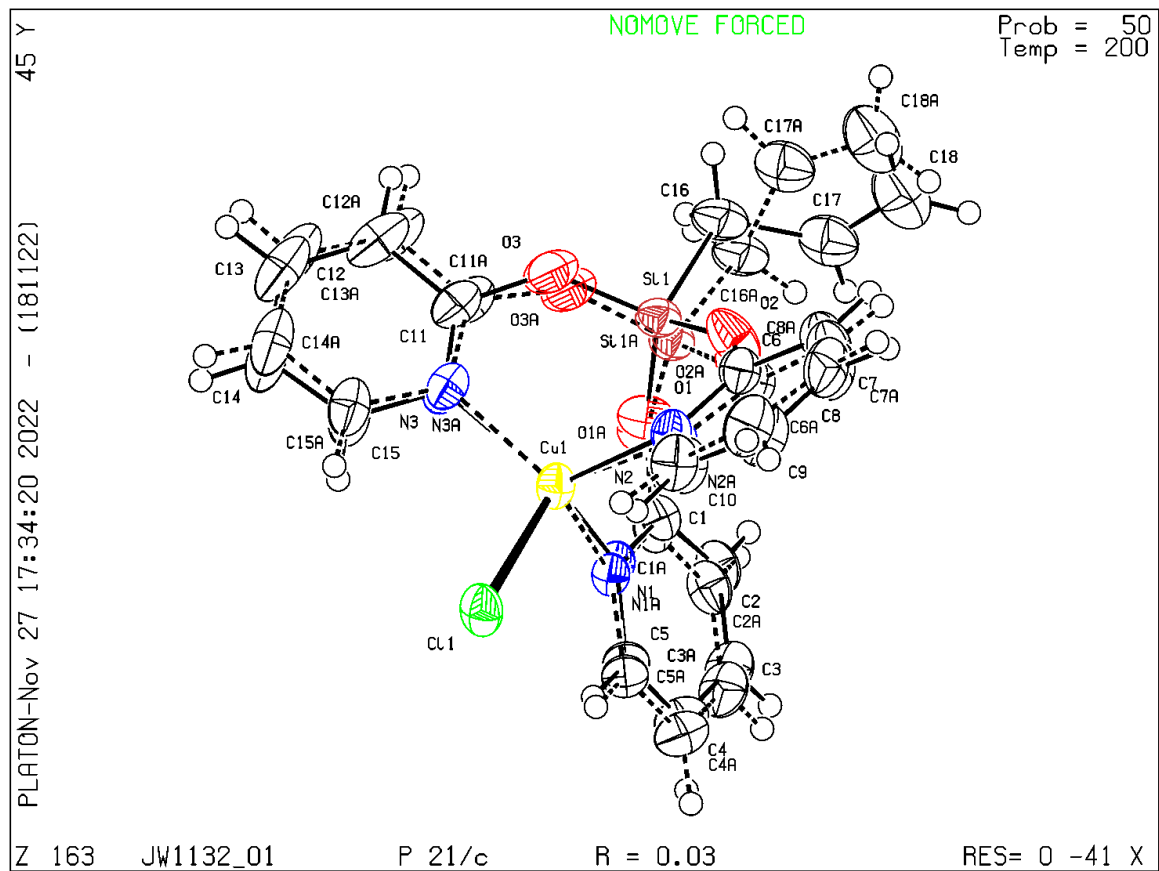



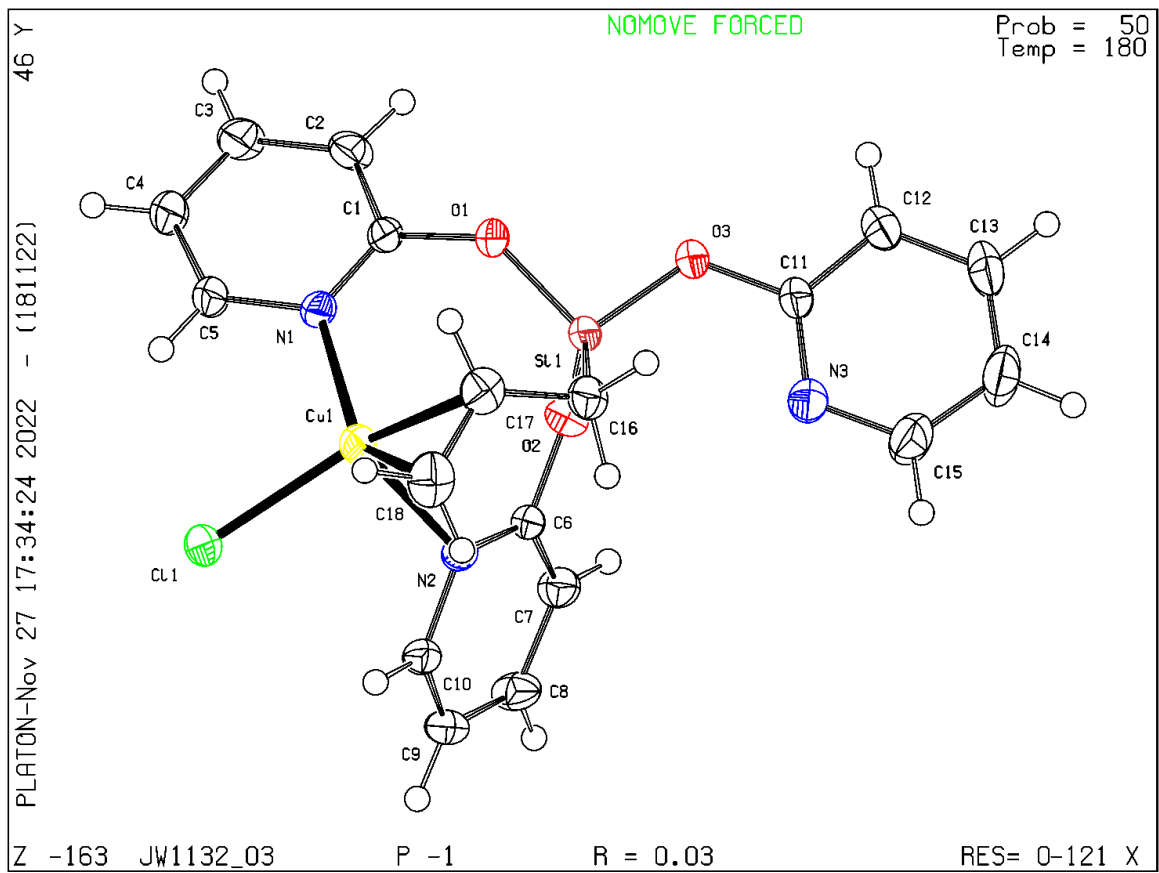



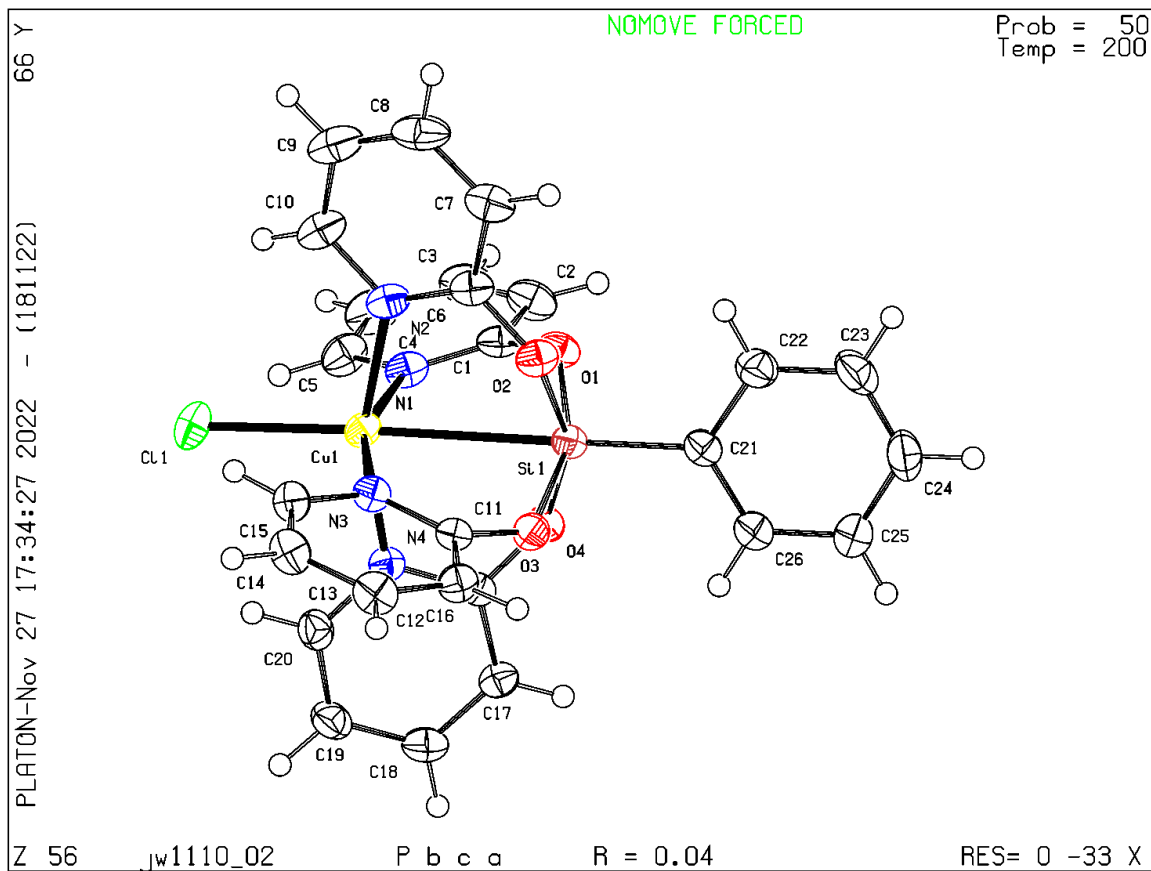



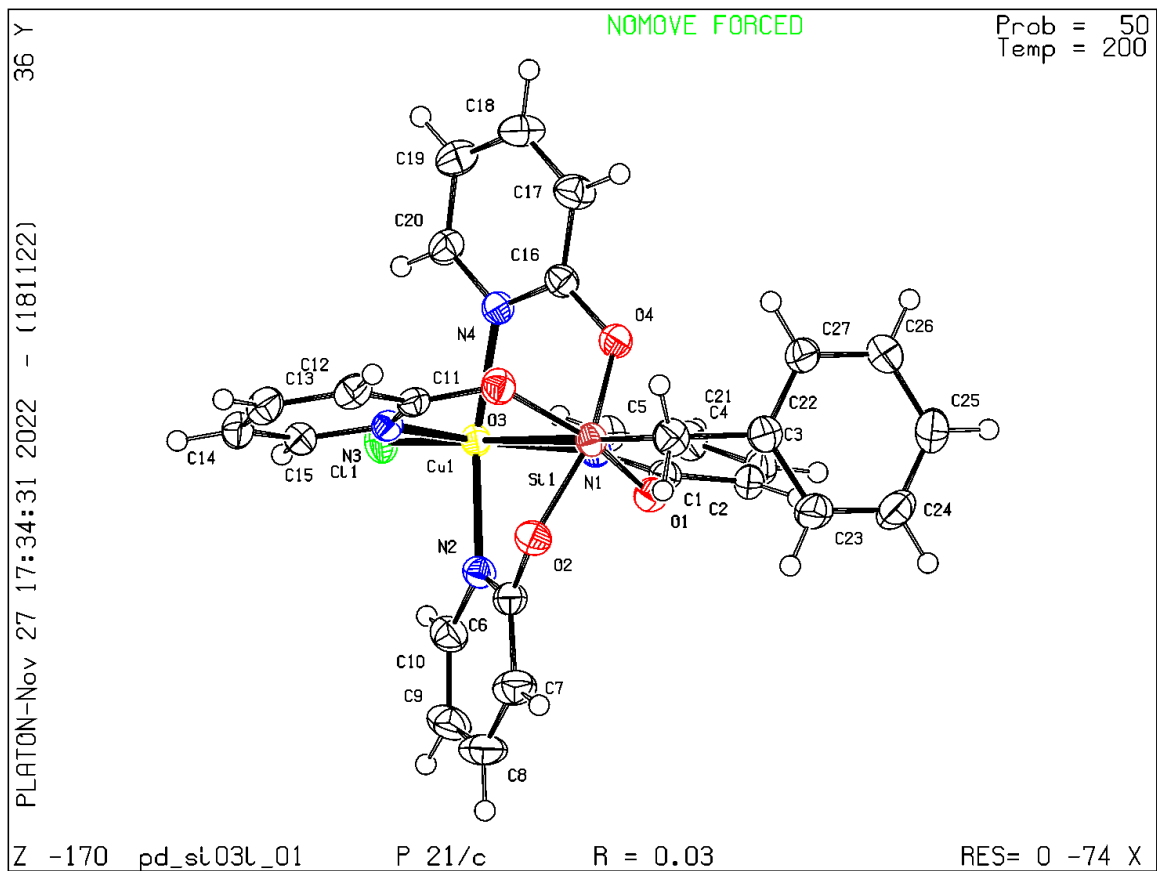



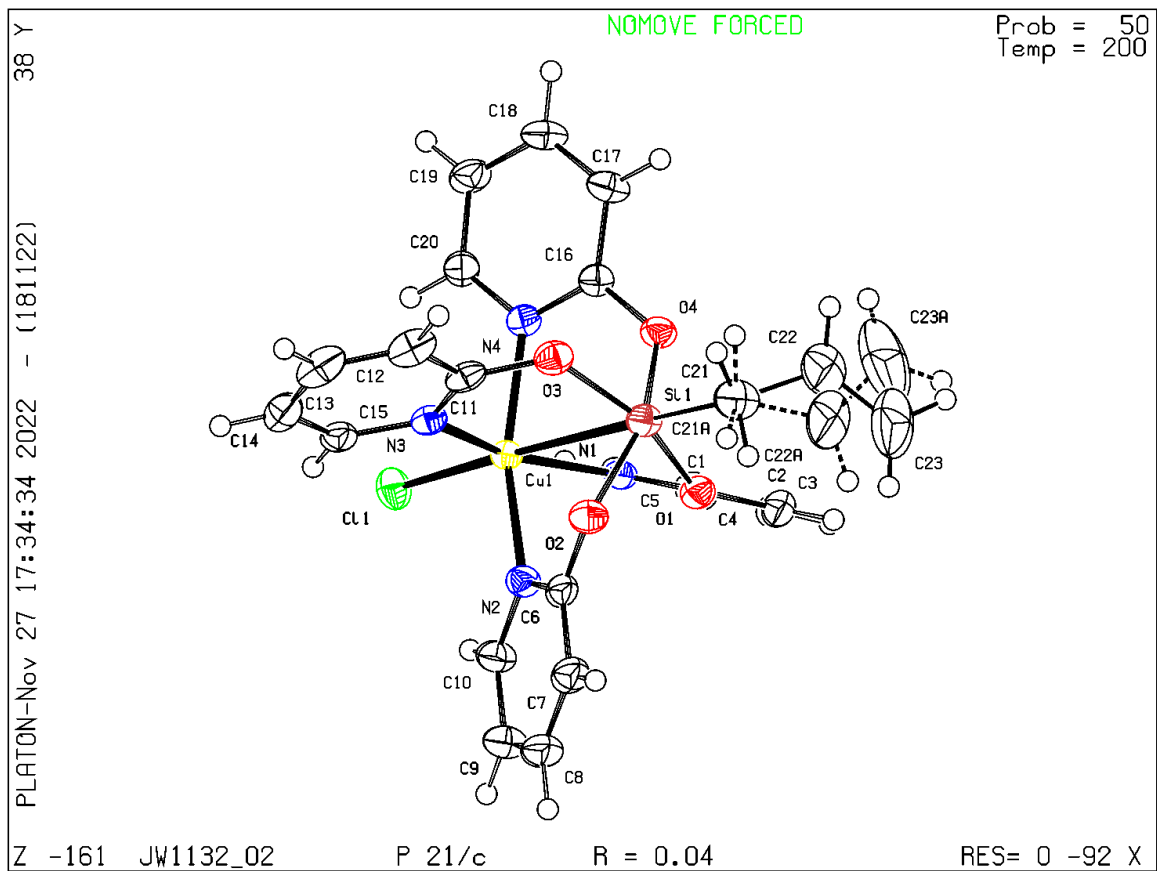



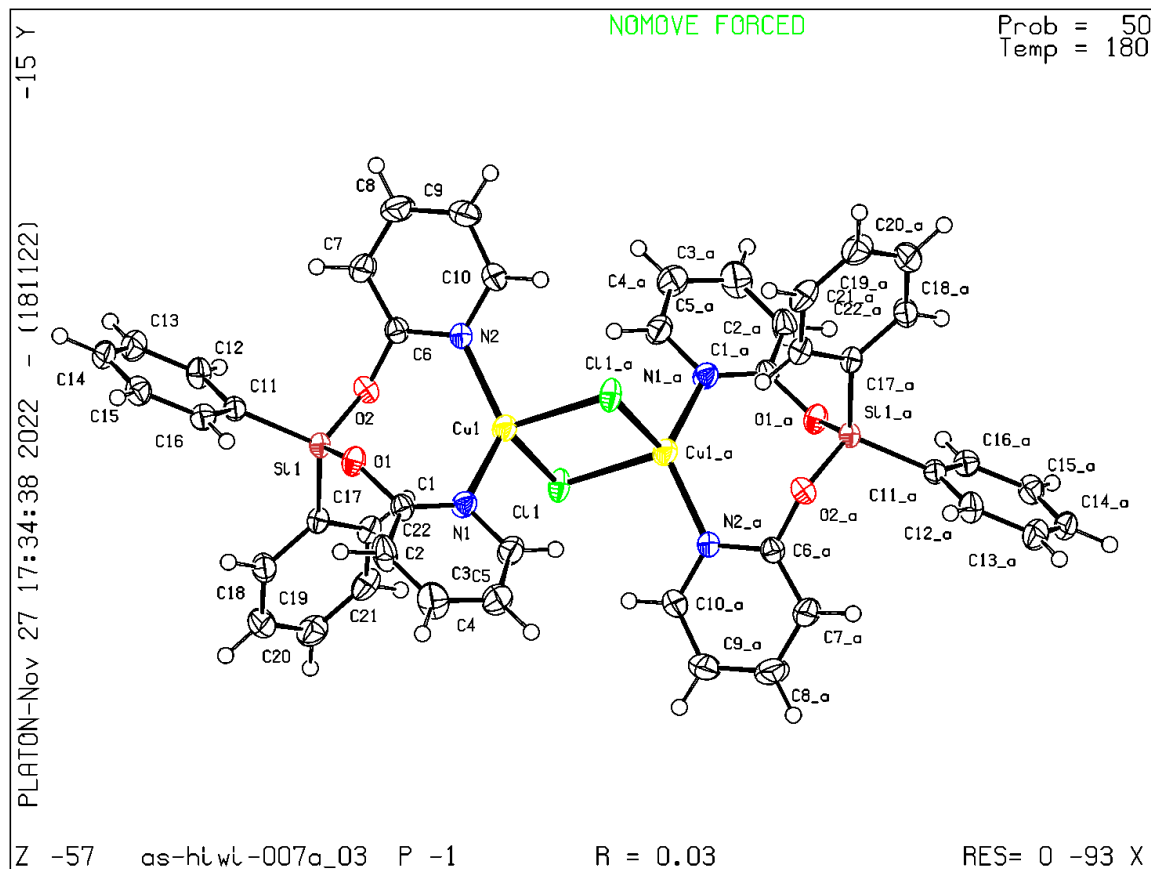



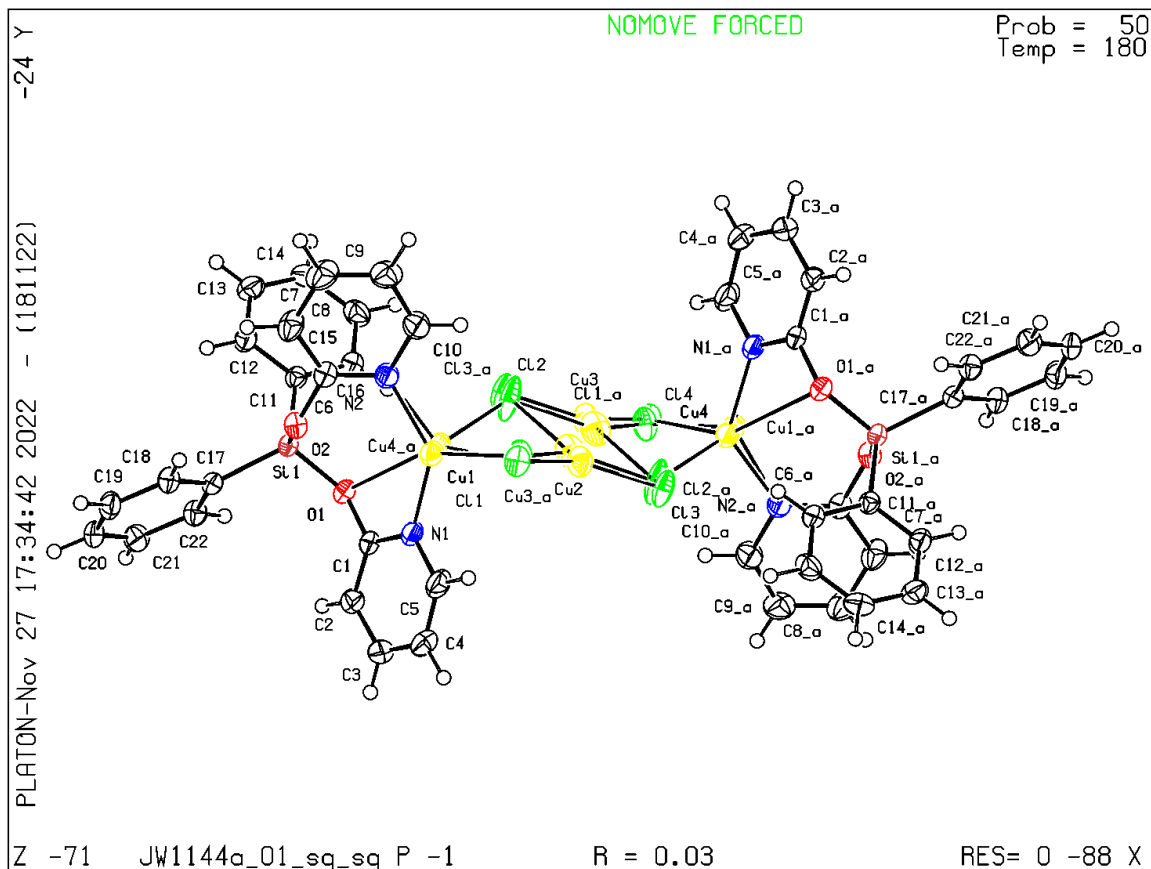



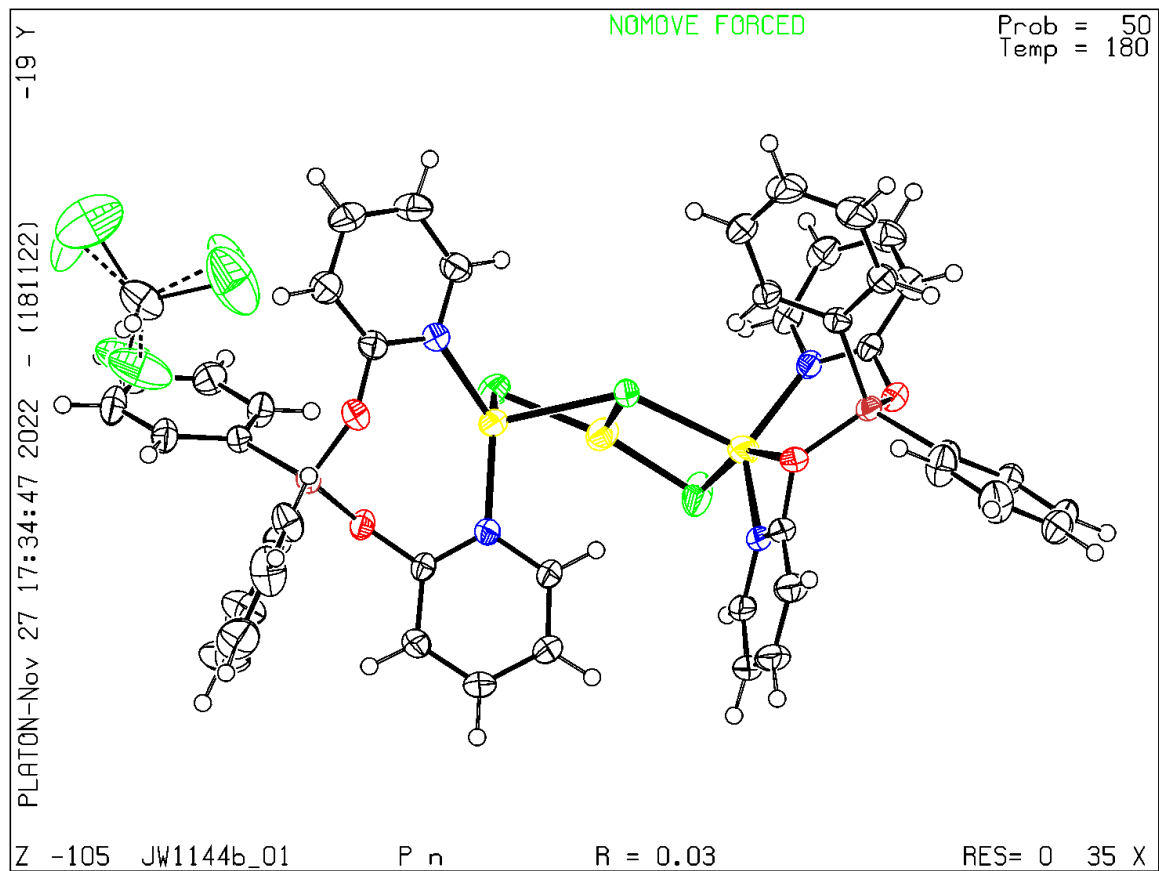

Supplement: s1 [file s1]
